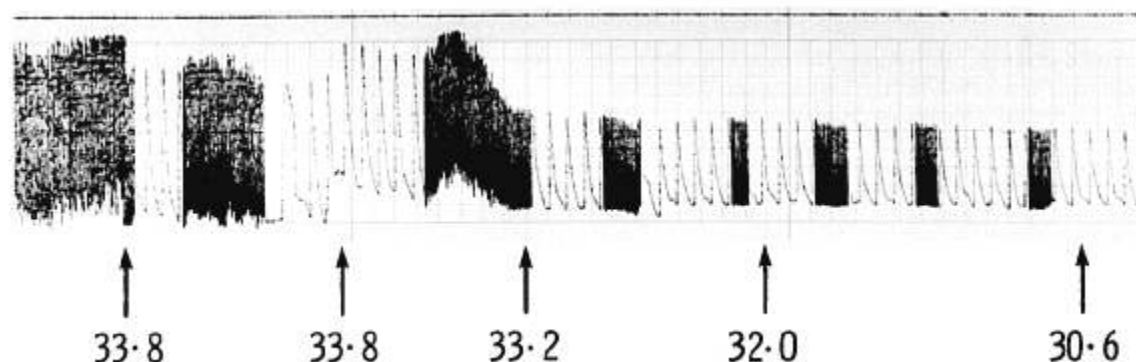

FIG. 1. Adductor twitch response to stimulation of the ulnar nerve during hypothermia from 33.8 to 30.6 C in a 6-year-old patient (no muscle relaxant administered).

experiments when the whole animal, with the exception of the limb studied, was normothermic.

STANLEY A. FELDMAN, B.Sc., M.B. B.S., F.F.A.R.C.S.  
Magill Department of Anaesthetics  
Westminster Medical School  
University of London  
Westminster Hospital  
Page Street  
London SW1P 2AP, England

#### REFERENCES

1. Ham J, Miller RD, Benet LZ, et al: The pharmacokinetics and pharmacodynamics of *d*-tubocurarine during hypothermia in the cat. *ANESTHESIOLOGY* 49:324-329, 1978
2. Feldman SA: Hypothermia and neuromuscular transmission. *Proc VI World Congress of Anaesthesiology, Excerpta Medica*, 1976, p 27
3. Thornton RJ, Blakeney C, Feldman SA: Hypothermia, neuromuscular conduction and the action of gallamine in dogs, referred to in *Practice of Anaesthesia*, Edited by HC Churchill-Davidson. London, Lloyd Luke, 1978, p 852
4. Feldman SA: Muscle Relaxants. London, W. B. Saunders Ltd., 1973, pp 119-120
5. Thornton RJ, Blakeney C, Feldman SA: Anaesthetic Research Group summary. *Br J Anaesth* 48:264, 1976
6. Hubbard J, Jones SF, Landau EM: The effect of temperature change upon transmitter release, facilitation and post tetanic potentiation. *J Physiol (Lond)* 216:591-609, 1971
7. South FE: The phrenic nerve-diaphragm preparation in relation to temperature and hibernation. *Am J Physiol* 200:565-571, 1961
8. Katz B, Miledi R: The effect of temperature on the synaptic delay time at the neuromuscular junction. *J Physiol (Lond)* 181:656-670, 1965

(Accepted for publication April 18, 1979.)

Anesthesiology  
51:370-371, 1979

*In reply:*—Feldman's observations in man and animal that hypothermia is associated with a diminished amplitude of indirectly elicited twitch tension may explain in part the prolonged duration of neuromuscular blockade during hypothermia from nondepolarizing muscle relaxants.<sup>1,2</sup> We believe the temptation to attribute the effect of hypothermia on the neuromuscular junction to a single mechanism should be resisted. Hypothermia may affect several sites that could alter neuromuscular function, which include: nerve conduction, transmitter release, sensitivity of the cholinergic receptors, cholinesterase activity and mechanical properties of the muscle. A further complicating factor is that the effect of hypothermia appears to be species-dependent. For example, the conduction velocity in the nerve axon during hypothermia increases in the squid axon<sup>3</sup> and is unchanged

in the frog sartorius preparation.<sup>4</sup> Transmitter output from the nerve terminal is diminished during hypothermia in the mouse intercostal<sup>5</sup> and frog sartorius.<sup>6</sup> In the rat diaphragm, a more complex effect occurs. In one study a diminished transmitter output was observed.<sup>7</sup> Yet Hubbard *et al.*<sup>8</sup> found a biphasic response, with initial increase and peak at 20 C and subsequent diminution. Ward *et al.*<sup>9</sup> also found a biphasic response, but with an initial decrease in output to 27 C and subsequent increase at less than 20 C. The sensitivity of the postjunctional membrane to transmitter (as measured by miniature end-plate potential amplitude<sup>6,10,11</sup> or response to iontophoretic acetylcholine<sup>4,6,12,13</sup>) is decreased, unchanged, or increased, in different species. Cholinesterase activities of the erythrocytes and plasma are both depressed by hypothermia.<sup>14</sup> The response of directly stimulated muscle

during hypothermia is also variable in different species<sup>12,15,16</sup> and with different rates of stimulation.<sup>17</sup>

In addition, we believe Feldman's observation of diminished indirectly elicited twitch tension in patients during cooling deserves additional study. During our completed studies in cats, as well as ongoing studies in man, we have observed decreases, increases, and biphasic responses of twitch tension to hypothermia without muscle relaxants. The mechanism of hypothermia's effect on the interaction of muscle relaxants with the neuromuscular function obviously is complex. In spite of these problems concerning mechanism of action, there appears to be little doubt that hypothermia prolongs a nondepolarizing neuromuscular blockade.

JAY HAM, M.D.

*Assistant Professor of Anesthesia*

RONALD D. MILLER, M.D.

*Professor of Anesthesia and Pharmacology*

*Department of Anesthesia*

*University of California*

*San Francisco, California 94143*

#### REFERENCES

1. Ham J, Miller RD, Benet LZ, et al: Pharmacokinetics and pharmacodynamics of *d*-tubocurarine during hypothermia in the cat. *ANESTHESIOLOGY* 49:324-329, 1978
2. Miller RD, Agoston S, van der Pol F, et al: Hypothermia and the pharmacokinetics and pharmacodynamics of pancuronium in the cat. *J Pharmacol Exp Ther* 207:532-538, 1978
3. Hodgkin AL, Katz B: The effect of temperature on the electrical activity of the giant axon of the squid. *J Physiol* 109: 240-249, 1949
4. Katz B, Miledi R: The effect of temperature on the synaptic delay at the neuromuscular junction. *J Physiol* 181:656-664, 1965
5. Feigen GA, Peterson NS, Hofmann WW, et al: The effect of impure tetanus toxin on the frequency of miniature end-plate potentials. *J Gen Microbiol* 33:489-495, 1963
6. Takeuchi N: The effect of temperature on the neuromuscular junction of the frog. *Jpn J Physiol* 8:391-404, 1958
7. Hofmann WW, Parsons RL, Feigen GA: Effects of temperature and drugs on mammalian motor nerve terminals. *Am J Physiol* 211:135-140, 1966
8. Hubbard JI, Jones SF, Landau EM: The effect of temperature change upon transmitter release, facilitation, and post-tetanic potentiation. *J Physiol* 216:591-609, 1971
9. Ward D, Crowley WJ, Johns TR: Effect of temperature on the neuromuscular junction. *Am J Physiol* 222:216-219, 1972
10. Boyd IA, Martin AR: Spontaneous subthreshold activity at mammalian neuromuscular junctions. *J Physiol* 132:61-73, 1956
11. Choh-Luh L: Effect of cooling on neuromuscular transmission in the rat. *Am J Physiol* 194:200-206, 1958
12. Zink J, Bose D: Cold potentiation of neuromuscular transmission in the avian biventer cervicis muscle. *Eur J Pharmacol* 28:148-156, 1974
13. Harris JB, Leach GD: The effect of temperature on end-plate depolarization of the rat diaphragm produced by suxamethonium and acetylcholine. *J Pharm Pharmacol* 20: 194-198, 1968
14. Foldes FA: Factors which alter the effects of muscle relaxants. *ANESTHESIOLOGY* 20:464-504, 1959
15. Thornton RJ, Blakeney C, Feldman SA: The effect of hypothermia on neuromuscular conduction. *Br J Anaesth* 48: 264, 1976
16. Hanson J: Effects of repetitive stimulation on membrane potentials and twitch in human and rat intercostal muscle fibers. *Acta Physiol Scand* 92:238-248, 1974
17. Hill AV: The influence of temperature on the tension developed in an isometric twitch. *Proc R Soc (Series B)* 138: 349-354, 1951

(Accepted for publication April 18, 1979.)
